# Supplementary material for: Plastin-3 extends survival and reduces severity in mouse models of spinal muscular atrophy
Source: JCI journal article supplement (doi:10.1172/jci.insight.89970), 2017-03-08
Supplement: sd1 [file 1]

Figure S1A

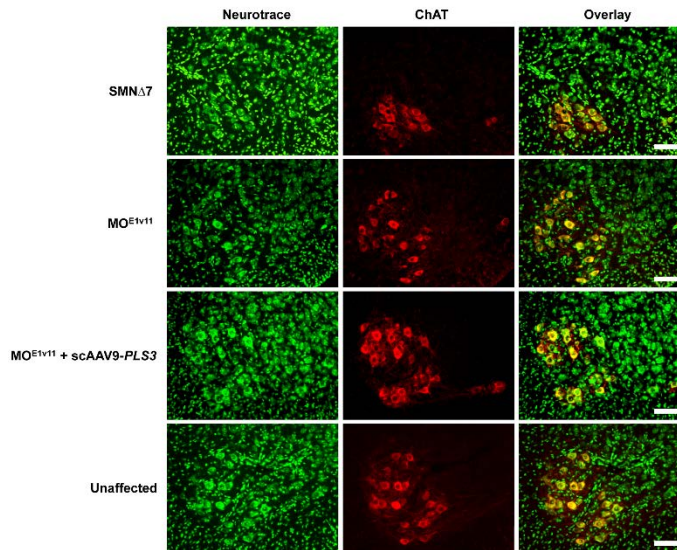

Figure S1B

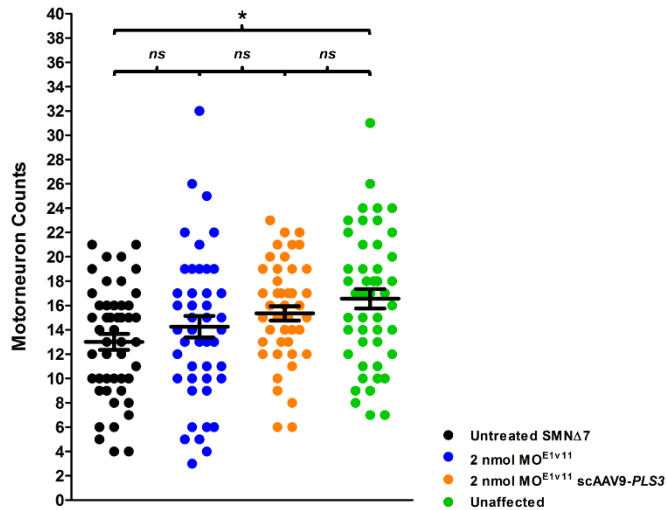

Figure S1C

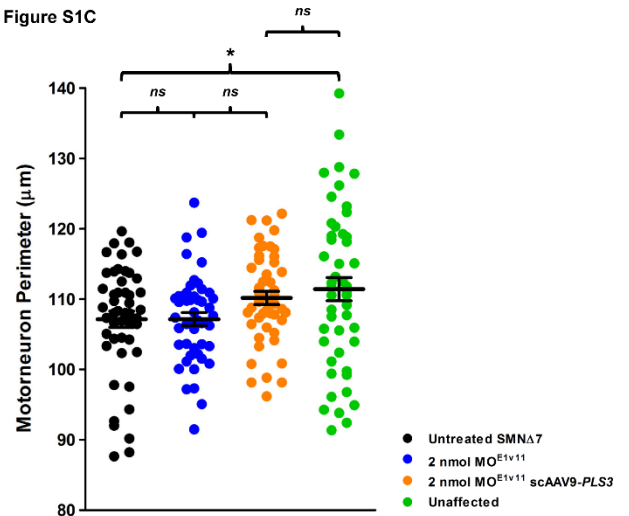

**Supplemental Figure 1. scAAV9-PLS3 does not significantly improve loss of  $\alpha$  motor neurons in the L4-L6 ventral horn.** (A) Representative images of L4-L6 cross sections immunohistochemically labelled with NeuroTrace Nissl (green) and ChAT (red). ChAT positive cells represent  $\alpha$  motor neurons. Scale bars represent 100  $\mu$ m. (B) Graph of motor neuron counts between L4-L6. Data points represent the number of cell bodies per section, with 15 or 16 sections quantified per mouse (N = 3 per treatment group). (C) Graph of average motor neuron perimeter per section. (\*  $p < 0.05$ )
